# Supplementary material for: Intracellular fate of carbon nanotubes inside murine macrophages: pH-dependent detachment of iron catalyst nanoparticles
Source: PubMed Central journal article supplement (PMC3699388; doi:10.1186/1743-8977-10-24), 2013-06-25

# Supplementary figure 3

a

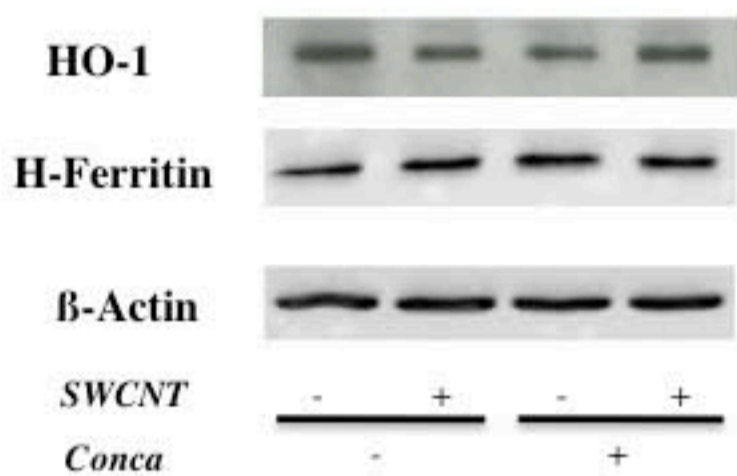

b

HO-1

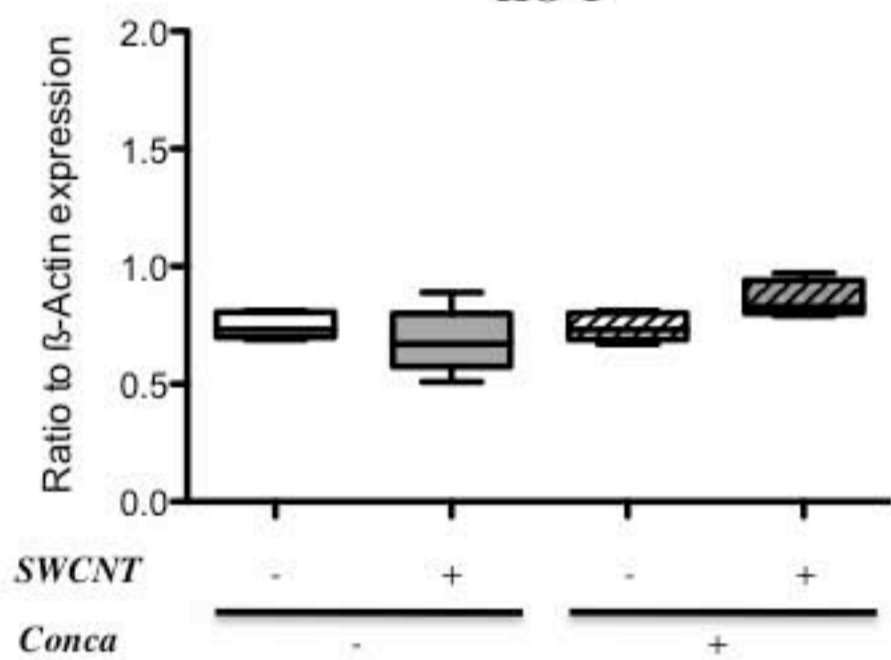

H-Ferritin

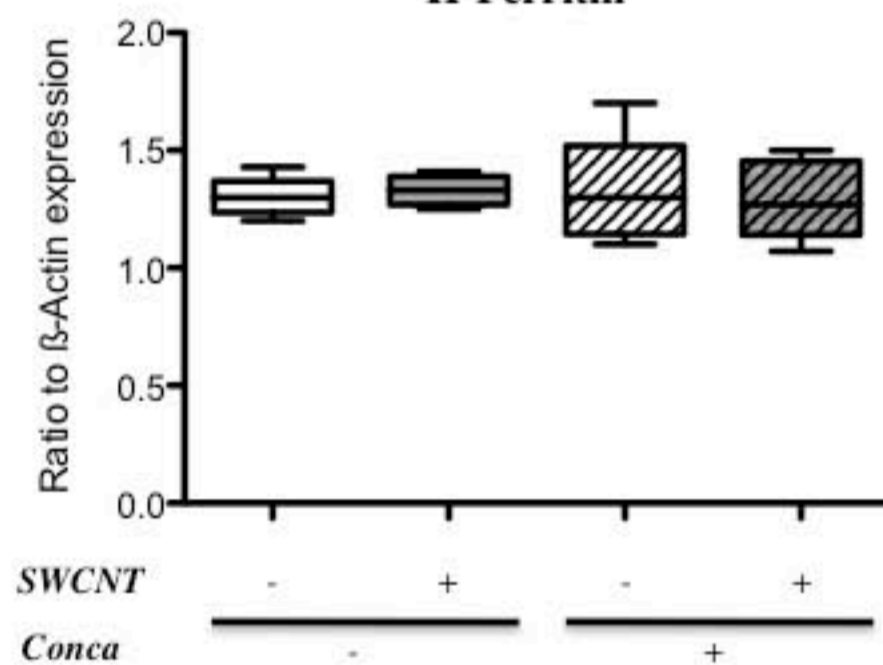

Supplement: 1743-8977-10-24-S3.pdf [file 1743-8977-10-24-S3.pdf]
